# Supplementary material for: Female-specific effects of the catechol-O-methyl transferase Val158Met gene polymorphism on working memory-related brain function
Source: publisher site journal article supplement (doi:10.18632/aging.104059), 2020-11-21
Supplement: Supplementary file [file aging-v12i23-104059-supplementary-material-SD1.pdf]

## SUPPLEMENTARY TABLES

**Supplementary Table 1. Demographics and working memory performance in the imaging subgroup.**

|                            | Met allele carriers (N = 44) |                    | Val homozygotes (N = 77) |                    | COMT<br>F/ $\chi^2$ (p) <sup>a</sup> | Sex<br>F/ $\chi^2$ (p) <sup>a</sup> | COMT × Sex<br>F/ $\chi^2$ (p) <sup>a</sup> |
|----------------------------|------------------------------|--------------------|--------------------------|--------------------|--------------------------------------|-------------------------------------|--------------------------------------------|
|                            | Male<br>(N = 19)             | Female<br>(N = 25) | Male<br>(N = 31)         | Female<br>(N = 46) |                                      |                                     |                                            |
| Age, yrs                   | 67.05±8.30                   | 63.32±7.94         | 66.97±6.88               | 64.91±6.68         | 0.29(0.59)                           | 4.33(0.04)                          | 0.36(0.55)                                 |
| Education, yrs             | 11.63±2.87                   | 10.60±2.93         | 12.03±3.59               | 11.54±3.02         | 1.25(0.27)                           | 1.60(0.21)                          | 0.20(0.65)                                 |
| APOE $\epsilon$ 4 carriers | 5(26%)                       | 7(28%)             | 7(23%)                   | 16(35%)            | 0.09(0.76)                           | 1.01(0.32)                          | 1.45(0.69)                                 |
| MMSE, score                | 28.21±1.36                   | 27.80±1.47         | 28.29±1.66               | 27.98±1.54         | 0.03(0.87)                           | 1.05(0.31)                          | 0.01(0.92)                                 |
| DST, score                 |                              |                    |                          |                    |                                      |                                     |                                            |
| Forward                    | 7.83±1.15                    | 7.56±1.56          | 7.45±1.34                | 7.43±1.47          | 2.19(0.14)                           | 0.24(0.62)                          | 0.19(0.66)                                 |
| Backward                   | 4.79±1.18                    | 4.52±1.08          | 4.74±1.50                | 4.70±1.35          | < 0.01(0.99)                         | 0.15(0.70)                          | 0.13(0.72)                                 |
| 2-back task performance    |                              |                    |                          |                    |                                      |                                     |                                            |
| Reaction Time, ms          | 591.95±95.44                 | 619.44±123.27      | 637.11±107.37            | 608.85±113.59      | 0.70(0.40)                           | 0.02(0.89)                          | 1.72(0.19)                                 |
| Accurate Rate              | 0.93±0.05                    | 0.92±0.05          | 0.92±0.05                | 0.89±0.10          | 2.48(0.12)                           | 5.56(0.02)                          | 0.07(0.80)                                 |

Values are means ± SD.

COMT, catechol-*O*-methyltransferase Val<sup>158</sup>Met genotype; MMSE, Mini-Mental State Examination; DST, Digit Span Subtest.

<sup>a</sup> Comparisons between groups were performed using Wald  $\chi^2$ -test for APOE  $\epsilon$ 4. Two-way analysis of covariance (two-way ANCOVA) was used to determine the main effect of the genotype and sex on the MMSE and working memory performance, as well as the interaction between them (age, education, and APOE  $\epsilon$ 4 as covariates).

**Supplementary Table 2. Effects of COMT genotype and sex effects on task-related brain activity.**

| Brain region         | MNI coordinates                                                      |     |     | Cluster size | T value | P value |          |
|----------------------|----------------------------------------------------------------------|-----|-----|--------------|---------|---------|----------|
|                      | X                                                                    | Y   | Z   |              |         |         |          |
| Activation regions   | <b>Genotype effect:<br/>Met allele carriers &gt; Val homozygotes</b> |     |     |              |         |         |          |
|                      | Left inferior temporal gyrus                                         | -54 | -54 | -12          | 68      | 3.84    | 1.01E-04 |
|                      | Triangular part of left inferior frontal gyrus                       | -57 | 18  | 3            | 156     | 4.33    | 1.63E-05 |
|                      | <b>Sex effect:<br/>Male &gt; Female</b>                              |     |     |              |         |         |          |
|                      | Left angular gyrus                                                   | -45 | -69 | 39           | 246     | 4.22    | 2.45E-05 |
| Deactivation regions | <b>Interaction effect:</b>                                           |     |     |              |         |         |          |
|                      | Right precuneus                                                      | 3   | -51 | 24           | 30      | 3.30    | 6.50E-04 |
|                      | Right superior occipital gyrus                                       | 15  | -87 | 27           | 37      | 3.67    | 1.87E-04 |

**Supplementary Table 3. Effects of *COMT* genotype and sex on task-based background functional connectivity.**

| ROI seed                                                              | Brain region                                                         | MNI coordinates |     |    | Cluster size | T value | P value  |
|-----------------------------------------------------------------------|----------------------------------------------------------------------|-----------------|-----|----|--------------|---------|----------|
|                                                                       |                                                                      | X               | Y   | Z  |              |         |          |
| Triangular part of left inferior frontal gyrus (Genotype effect seed) | <b>Sex effect:<br/>Male &lt; Female</b>                              |                 |     |    |              |         |          |
|                                                                       | Left calcarine                                                       | -9              | -63 | 9  | 181          | -4.10   | 3.82E-05 |
|                                                                       | Right calcarine                                                      | 18              | -60 | 12 | 56           | -3.89   | 8.55E-05 |
|                                                                       | Left superior temporal gyrus                                         | -63             | -18 | 9  | 38           | -3.89   | 8.53E-05 |
|                                                                       | Left rolandic operculum                                              | -36             | -30 | 15 | 25           | -4.76   | 2.86E-06 |
| Left angular gyrus (Sex effect seed)                                  | <b>Genotype effect:<br/>Met allele carriers &lt; Val homozygotes</b> |                 |     |    |              |         |          |
|                                                                       | Right angular gyrus                                                  | 45              | -63 | 45 | 31           | -3.37   | 5.09E-04 |
|                                                                       | <b>Sex effect:<br/>Male &lt; Female</b>                              |                 |     |    |              |         |          |
|                                                                       | Left medial superior frontal gyrus                                   | -3              | 51  | 21 | 45           | -3.94   | 6.96E-05 |
|                                                                       | Right superior temporal gyrus                                        | 57              | -48 | 21 | 31           | -4.27   | 2.00E-05 |
