# Supplementary material for: Female-specific effects of the catechol-O-methyl transferase Val158Met gene polymorphism on working memory-related brain function
Source: publisher site journal article supplement (doi:10.18632/aging.104059), 2020-11-21
Supplement: Supplementary file [file aging-v12i23-104059-supplementary-material-SD2.pdf]

## SUPPLEMENTARY FIGURES

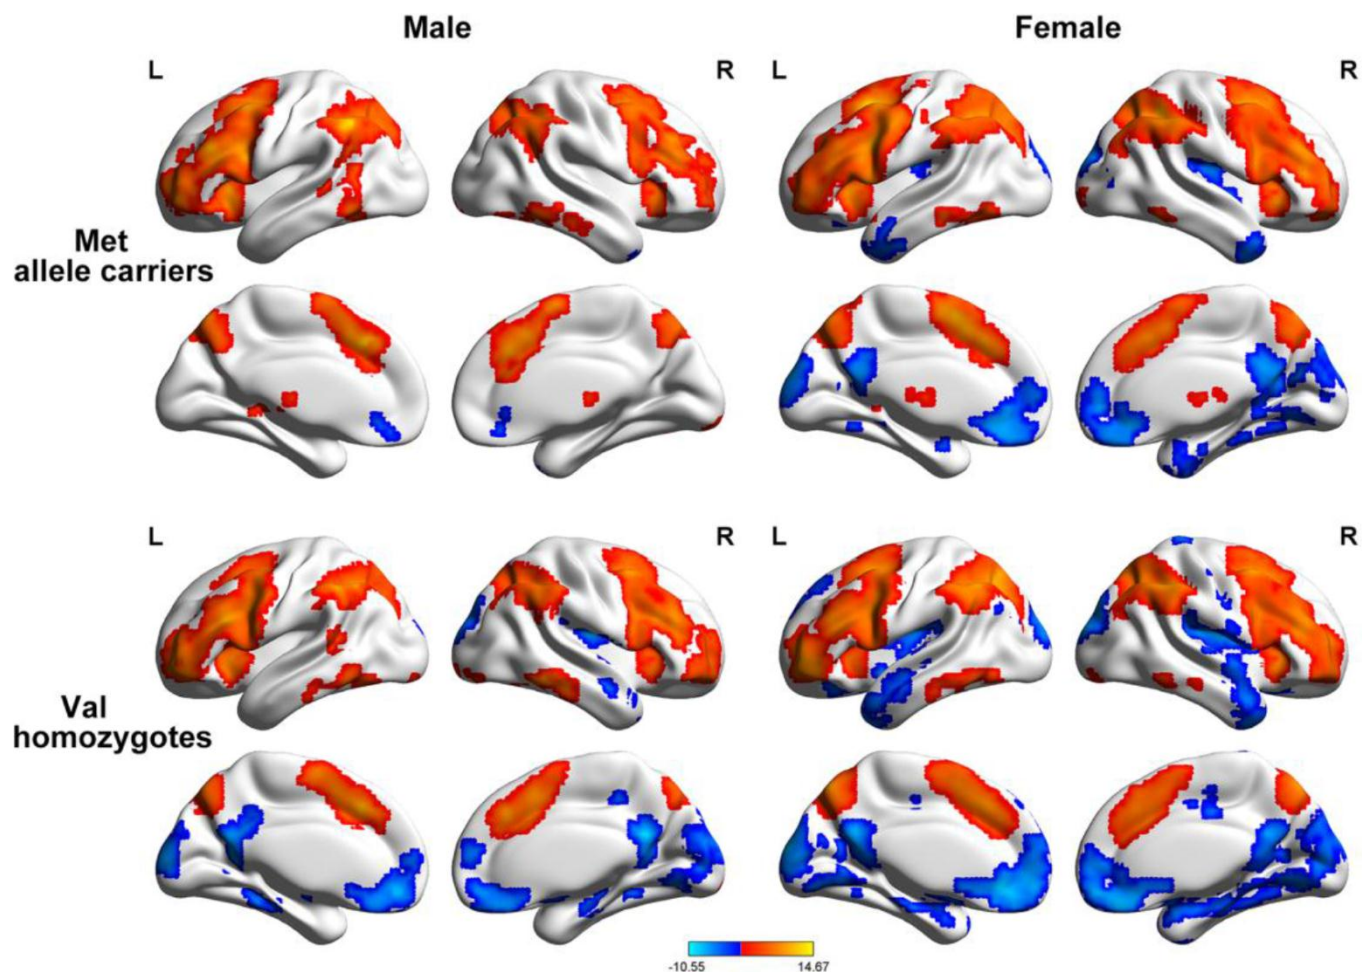

**Supplementary Figure 1. The spatial maps show the brain activation and deactivation under working memory task for the genotype and sex groups separately.** Group-level one-sample t test (age, years of education and *APOE*  $\epsilon 4$  status as covariates) was conducted to generate task-related brain activation and deactivation for each group, with a threshold of voxel  $p < 0.001$ . Warm color, activation regions; Cool color, deactivation regions.

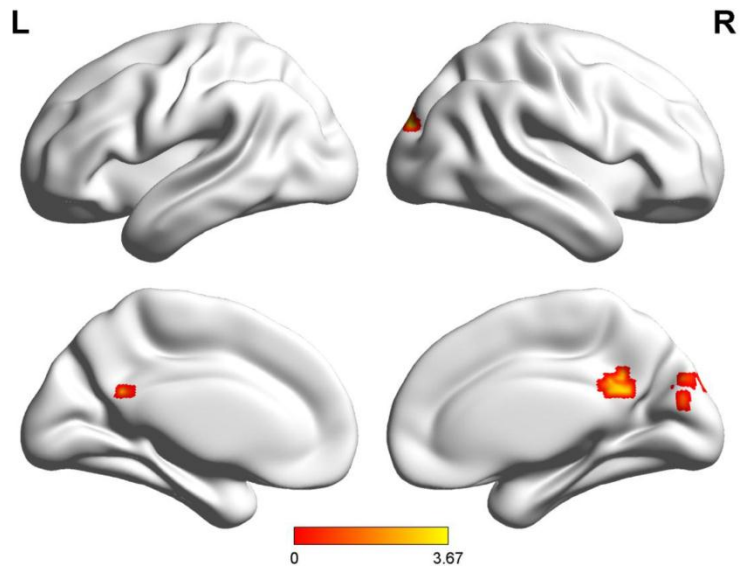

**Supplementary Figure 2. Rendering of regions with significant interaction effect on task-related brain deactivation.** Full factorial analysis with the *COMT* genotype (Met allele carriers vs. Val homozygotes) and sex (male vs. female) as independent factors was conducted for task-related brain deactivation regions, significant interaction effects were found in right precuneus and right superior occipital gyrus. Threshold, voxel  $p < 0.005$  and cluster-level false-positive rate  $p < 0.05$ .

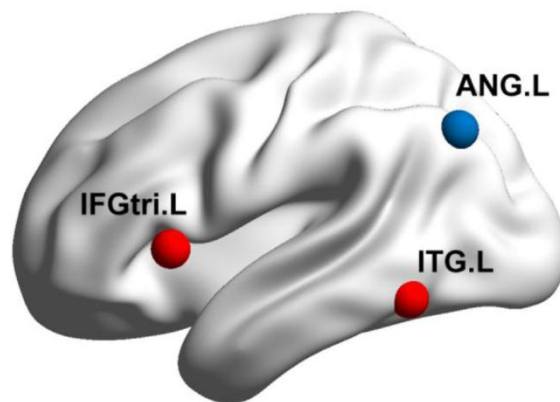

**Supplementary Figure 3. Representation of the seed regions.** Warm color, *COMT* genotype effect seeds; Cool color, sex effect seed; IFGtri.L, triangular part of left inferior frontal gyrus; ITG.L, left inferior temporal gyrus; ANG.L, left angular gyrus.
